# Supplementary material for: ATF6 aggravates angiogenesis-osteogenesis coupling during ankylosing spondylitis by mediating FGF2 expression in chondrocytes
Source: PubMed Central journal article supplement — iScience. 2021 Jun 28;24(7):102791. doi: 10.1016/j.isci.2021.102791 (PMC8281657; doi:10.1016/j.isci.2021.102791), 2021-06-28
Supplement: mmc1.pdf [file mmc1.pdf]

iScience, Volume 24

**Supplemental information**

**ATF6 aggravates angiogenesis-osteogenesis  
coupling during ankylosing spondylitis  
by mediating FGF2 expression in chondrocytes**

**Mengjun Ma, Hongyu Li, Peng Wang, Wen Yang, Rujia Mi, Jiahao Zhuang, Yuhang Jiang, Yixuan Lu, Xin Shen, Yanfeng Wu, and Huiyong Shen**

Supplementary information titles and legends

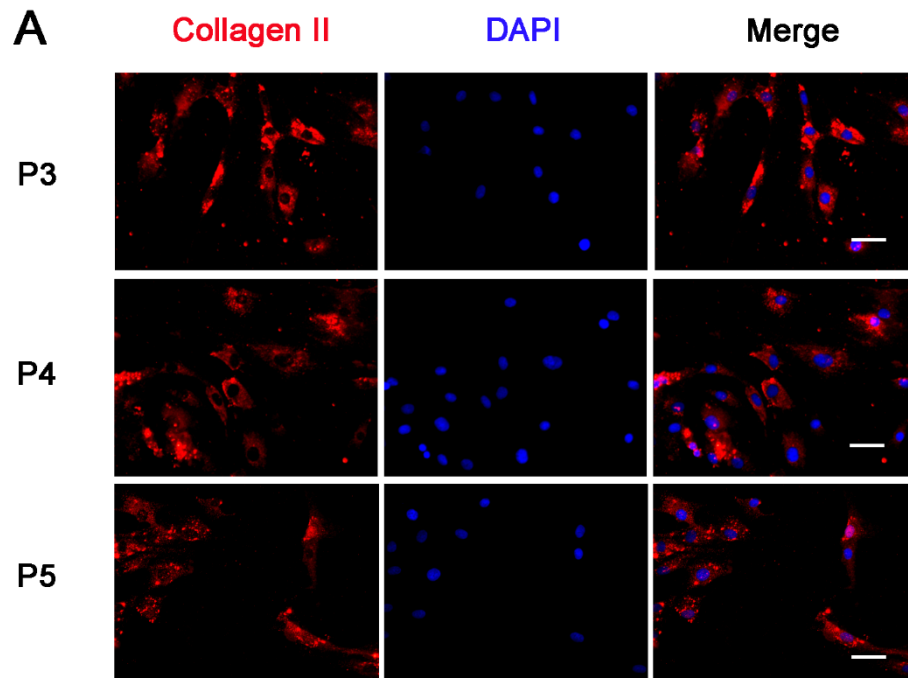

**Figure S1. Expression of collagen II in chondrocytes, related to Figure 1.**

(A) IHC staining for collagen II was performed on chondrocytes at passages 3-5. Scale bar, 50  $\mu$ m.

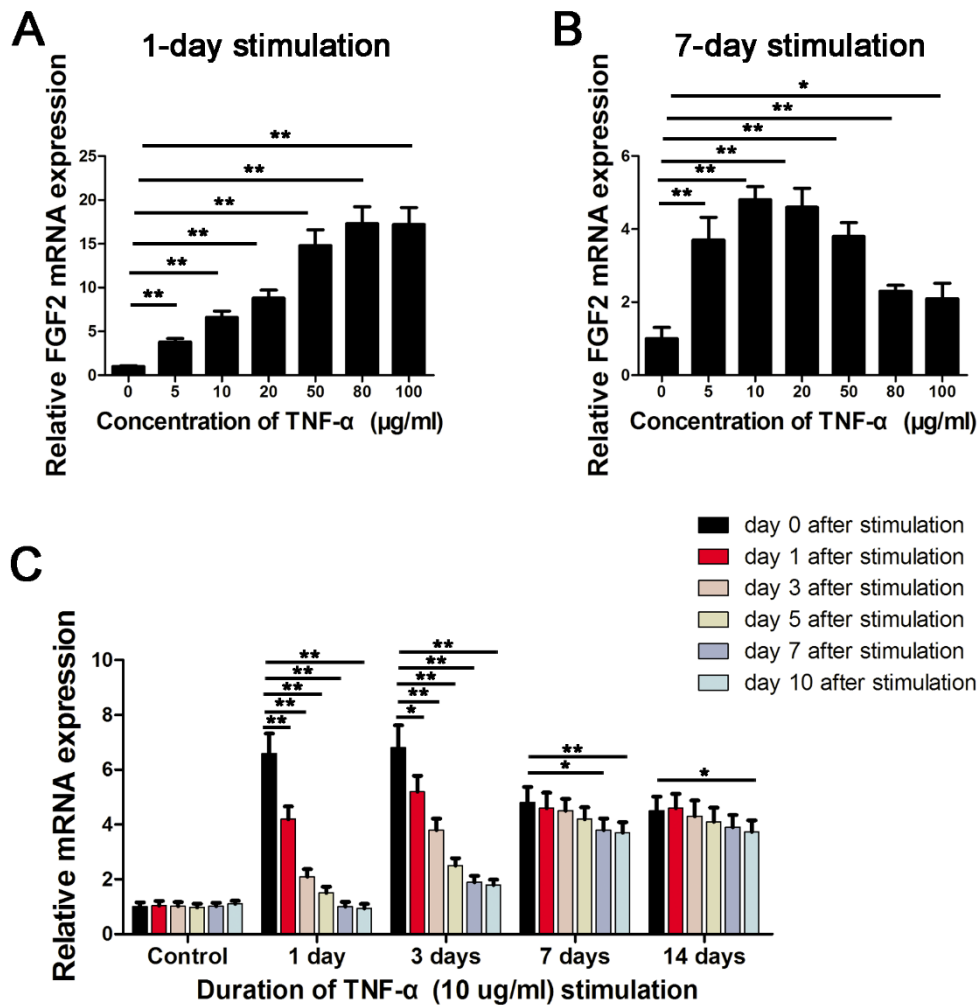

**Figure S2. Seven-day treatment with a low concentration of TNF-α exerted a sustained effect on chondrocyte FGF2 expression, related to Figure 1.**

(A) FGF2 mRNA levels were measured in chondrocytes treated with different concentrations of TNF-α for 1 day. (B) FGF2 mRNA levels were measured in chondrocytes treated with different concentrations of TNF-α for 7 days. (C) After treatment with 10 μg/ml TNF-α for a specific number of days (control, 1 day, 3 days, 7 days, or 14 days), chondrocytes were collected at 6 time points (day 0, day 1, day 3, day 5, day 7 and day 10) after treatment and RNA was extracted to determine FGF2 mRNA expression. Bars show the means ± SD.

\*P<0.05 and \*\*P<0.01, 2-tailed Student's t-test.

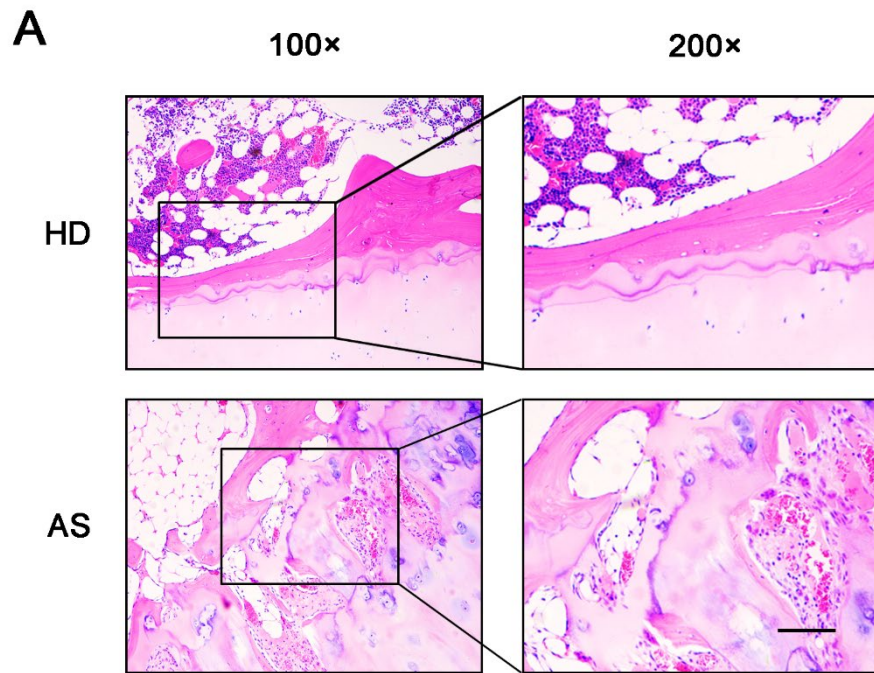

**Figure S3. The cartilage structure in femur heads from patients with AS was destroyed by granulation tissue, related to Figure 1.**

(A) H&E staining was performed on femur head cartilage from patients with AS. Scale bar, 100  $\mu$ m.

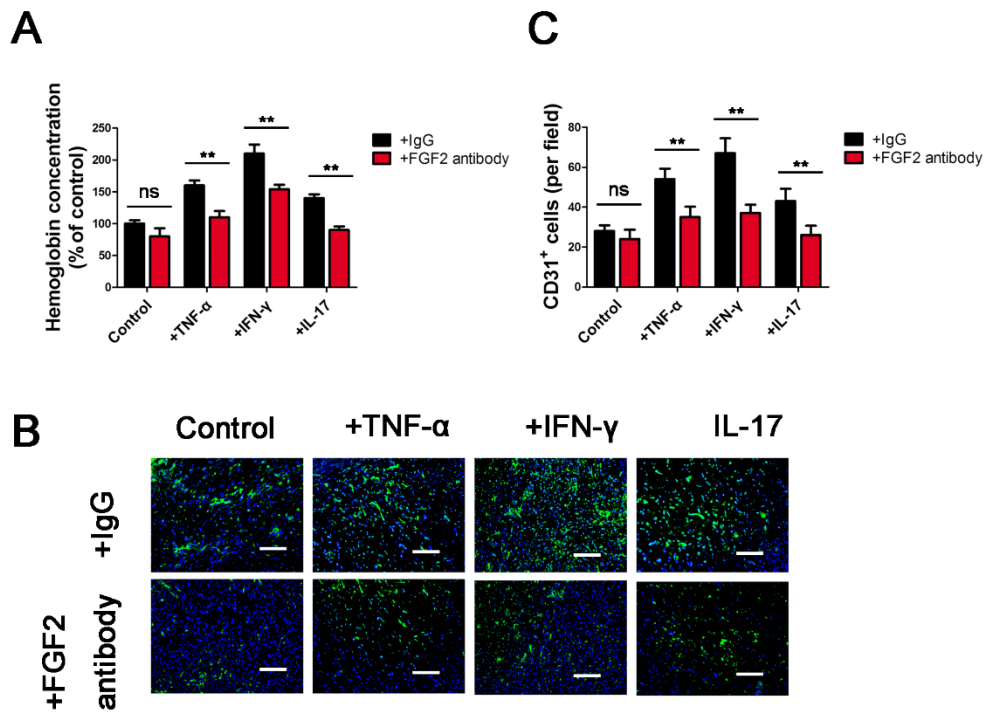

**Figure S4. Chondrocytes secrete FGF2 to induce angiogenesis *in vivo*, related to**

**Figure 3.**

Matrigel plugs containing chondrocyte CM and TNF- $\alpha$ -treated chondrocyte CM with or without an FGF-2-neutralizing antibody were subcutaneously injected into nude mice. The plugs were collected on day 7. (A) Hemoglobin levels in the plugs were quantified and normalized to the control group (n = 6 mice per group). (B) Paraffin sections of Matrigel plugs were stained with the endothelial cell marker CD31. Scale bar, 100  $\mu$ m. (C) CD31-positive cells were quantified.

Bars show the means  $\pm$  SD. \*P<0.05 and \*\*P<0.01, 2-tailed Student's t-test.

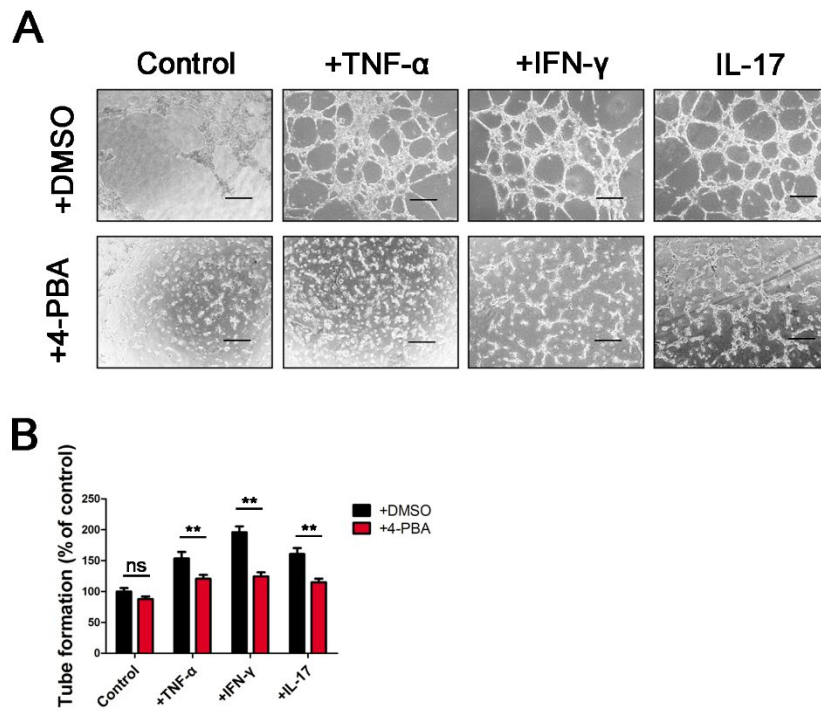

**Figure S5. The ERS alleviator 4-PBA inhibited the angiogenic effect of chondrocytes, related to Figure 3.**

(A&B) A tube-formation assay was performed on HUVECs cultured in CM (A). The number of branches was calculated and quantified using ImageJ software (B). Scale bar, 100  $\mu$ m. Bars show the means  $\pm$  SD. \* $P < 0.05$  and \*\* $P < 0.01$ , 2-tailed Student's t-test.

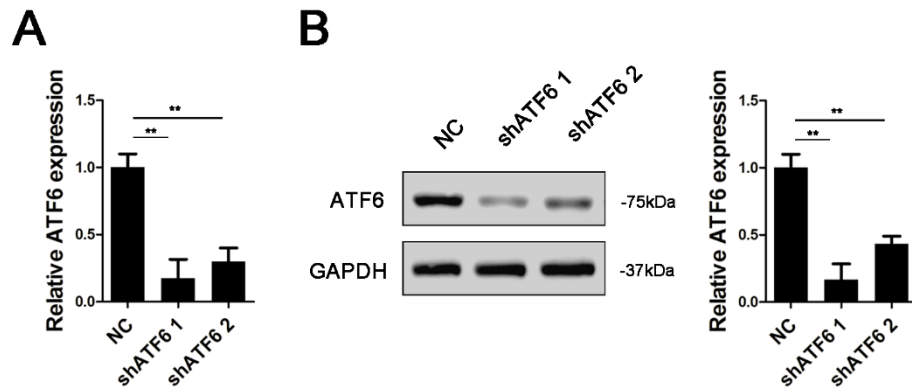

**Figure S6. Knockdown of ATF6 expression in chondrocytes, related to Figure 4.**

(A&B) qRT-PCR and WB measurement of ATF6 expression in chondrocytes. Bars show the means  $\pm$  SD. \* $P < 0.05$  and \*\* $P < 0.01$ , 2-tailed Student's t-test.

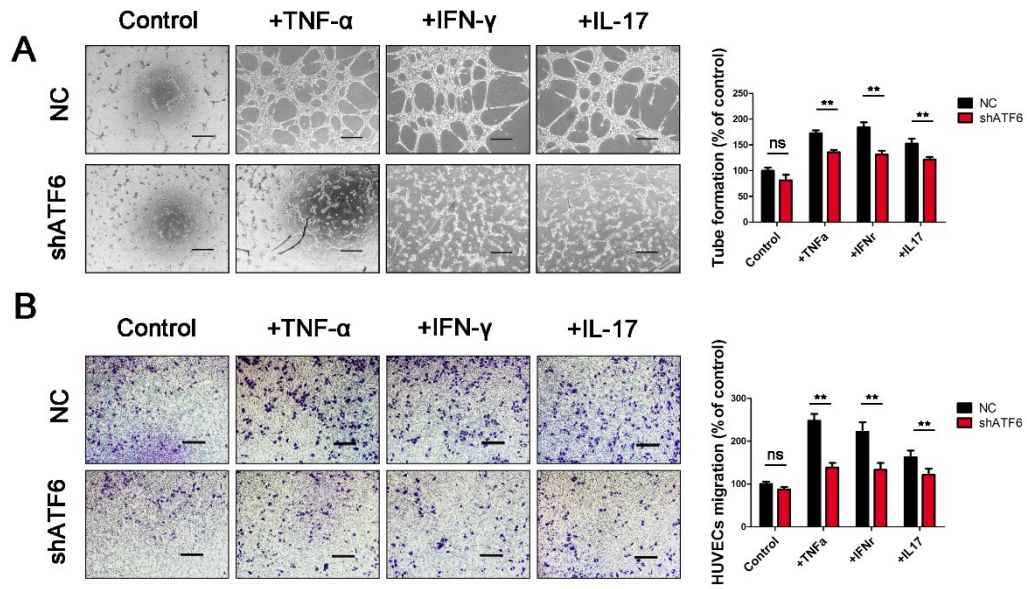

**Figure S7. ATF6 knockdown inhibited the angiogenic effect of chondrocytes, related to Figure 4.**

(A&B) Tube-formation assays and Transwell migration assays were performed on HUVECs cultured in CM. The numbers of branches and migratory cells were calculated and quantified using ImageJ software. Scale bar, 100  $\mu$ m. Bars show the means  $\pm$  SD. \* $P$ <0.05 and \*\* $P$ <0.01, 2-tailed Student's t-test.



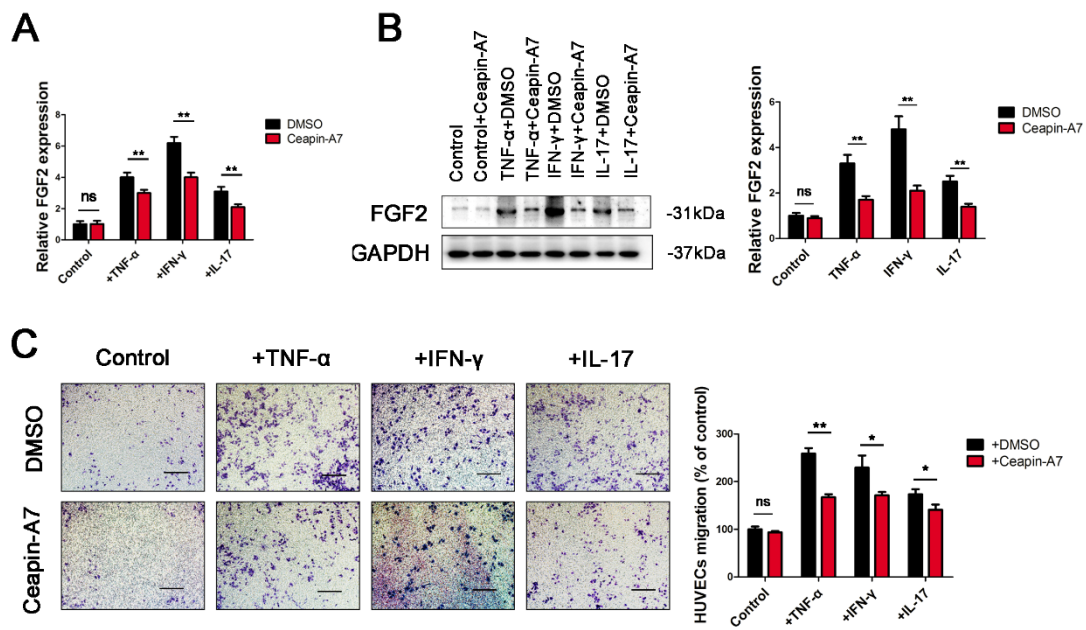

**Figure S8. The ATF6 inhibitor Ceapin-A7 inhibited the angiogenic effect of chondrocytes, related to Figure 4.**

(A&B) Levels of the FGF2 mRNA and protein in chondrocytes were measured after treatment with Ceapin-A7. (C) Transwell migration assays were performed on HUVECs cultured in CM. The number of migratory cells was calculated and quantified using ImageJ software. Scale bar, 100  $\mu$ m. Bars show the means  $\pm$  SD. \*P<0.05 and \*\*P<0.01, 2-tailed Student's t-test.

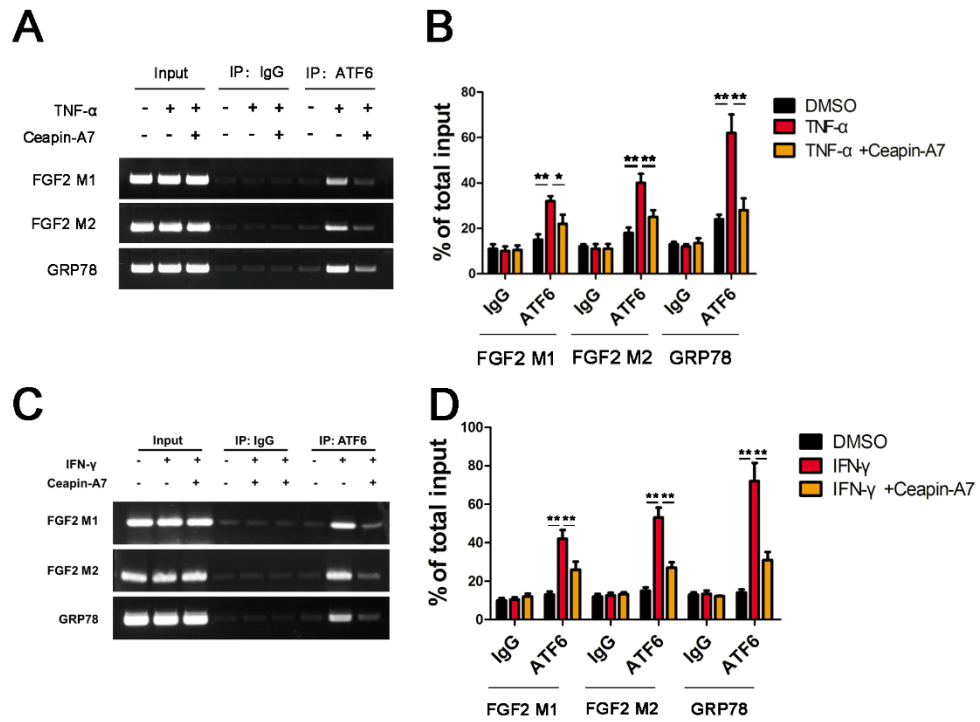

**Figure S9. ATF6 binds to the human FGF2 promoter, related to Figure 5.**

(A-D) After chondrocytes were treated with TNF- $\alpha$  and IFN- $\gamma$  for 48 h, the ability of ATF6 to bind to the *FGF2* and *GRP78* promoters was analyzed using ChIP assays. Bars show the means  $\pm$  SD. \* $P$ <0.05 and \*\* $P$ <0.01, one-way ANOVA followed by Dunnett's *post hoc* test.

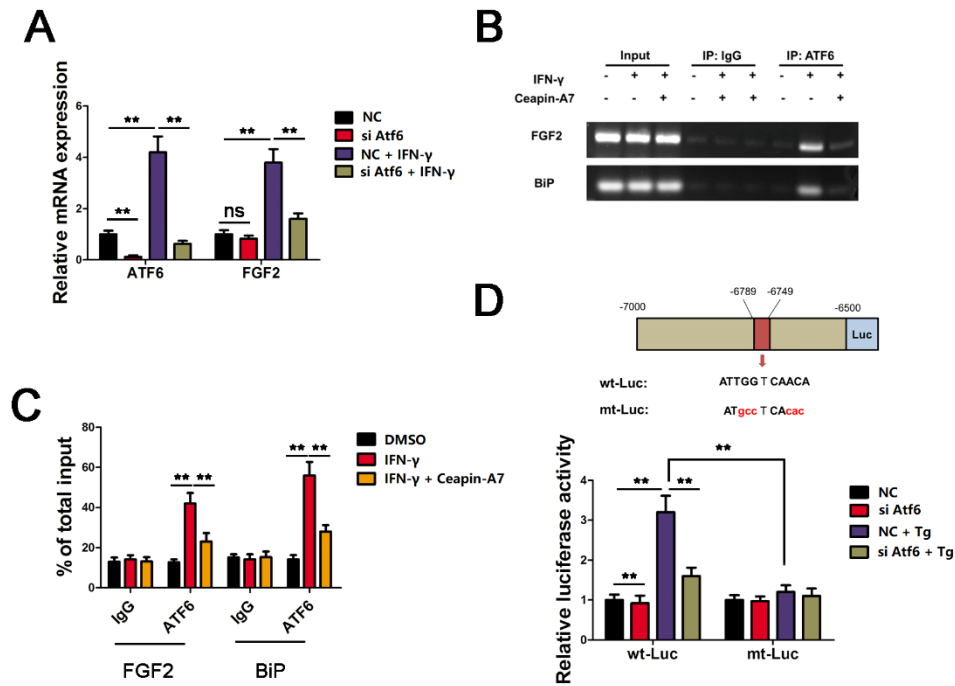

**Figure S10. ATF6 binds to the mouse FGF2 promoter and promotes FGF2 expression, related to Figure 5.**

(A) The expression of the *ATF6* and *FGF2* mRNAs was measured after ATF6 knockdown and IFN-γ treatment in the mouse chondrogenic cell line ATDC5. (B&C) After treatment with IFN-γ for 48 h, the ability of ATF6 to bind the mouse *FGF2* and *BiP* promoters in chondrocytes was analyzed using ChIP assays. (D) Diagram of the locations of ERSE in the mouse *FGF2* 5'-flanking region, their sequences (wt), and the mutations to those sequences (mt). ATDC5 cells were transfected with plasmids encoding mouse *FGF2*(-7000/-6500)-Luc wt or mt. Then, ATDC5 cells were treated with the ATF6 siRNA or the ERS inducer Tg. Forty-eight hours later, luciferase levels were measured in extracts. Bars show the means ± SD. \*P<0.05 and \*\*P<0.01, one-way ANOVA followed by Dunnett's *post hoc* test.

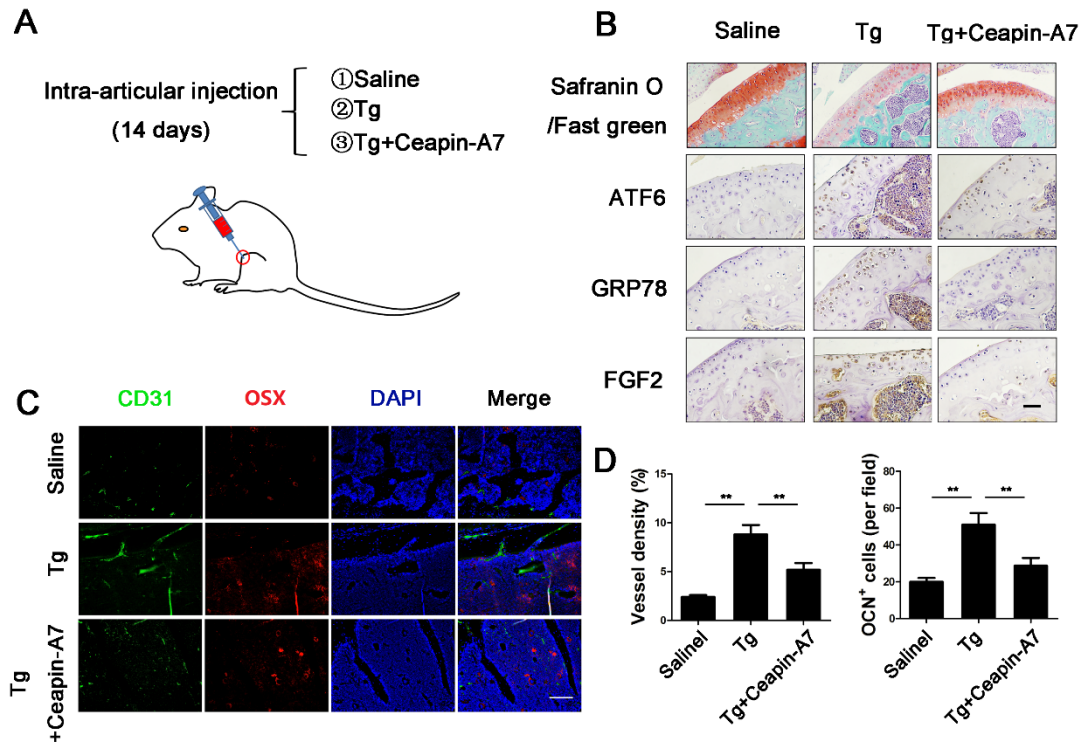

**Figure S11. Ceapin-A7 inhibited ERS-induced FGF2 expression and osteogenesis in mice, related to Figure 6.**

(A) Diagram of the intra-articular injection of saline, Tg or Tg+Ceapin-A7 in C57BL/6 mice for 2 weeks. (B) Safranin O/fast green staining of knee joints of treated mice showing articular cartilage degeneration. IHC staining for ATF6, GRP78 and FGF2 was performed on knee joints from C57BL/6 mice after treatment with saline, Tg or Tg+Ceapin-A7 for 2 weeks. Scale bar, 50  $\mu$ m. (C) IF staining of knee joints from C57BL/6 mice showing endothelial cells (CD31<sup>+</sup>) and activated osteoblasts (OSX<sup>+</sup>) around knee joints. Scale bar, 50  $\mu$ m. (D) Quantification of the proportions of CD31<sup>+</sup> vessels and OSX<sup>+</sup> cells. (n = 10 mice per group). Bars show the means  $\pm$  SD. \*P<0.05 and \*\*P<0.01, one-way ANOVA followed by Dunnett's *post hoc* test.

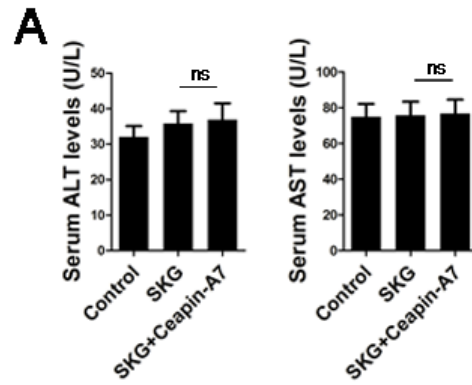

**Figure S12. Ceapin-A7 did not cause liver damage in SKG mice, related to Figure 6.**

(A) Serum levels of alanine amino transferase (ALT) and aspartate amino transferase (AST) were measured. (n = 10 mice per group). Bars show the means  $\pm$  SD. \*P<0.05 and \*\*P<0.01, one-way ANOVA followed by Dunnett's *post hoc* test.

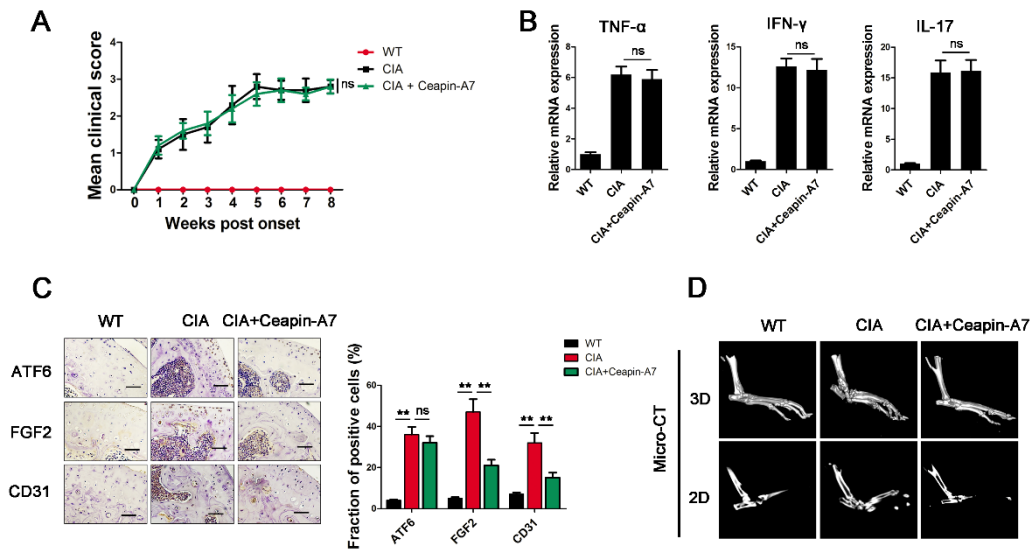

**Figure S13. Ceapin-A7 inhibited FGF2 expression in the CIA model, related to Figure 6.**

(A) Clinical scores were measured in SKG mice. (B) Local expression of the *TNF- $\alpha$* , *IFN- $\gamma$*  and *IL-17* mRNAs in the hind paws of CIA mice. (C) IHC staining for ATF6, FGF2 and CD31 in knee joints. ATF6-, FGF2-, CD31-positive cells were quantified. Scale bar, 50  $\mu$ m. (D) Representative micro-CT images of ankles obtained from CIA mice in WT, 8 weeks after induction, and 8 weeks after induction and treatment with Ceapin-A7. (n = 10 mice per group). Bars show the means  $\pm$  SD. \*P<0.05 and \*\*P<0.01, one-way ANOVA followed by Dunnett's *post hoc* test.

**Table S1. Characteristics of the study subjects, related to STAR methods.**

|                         | Healthy donors | Patients with AS |
|-------------------------|----------------|------------------|
| Number                  | 30             | 30               |
| Age, years              | 28.5±8.5       | 27.9±9.1         |
| Male, n (%)             | 16 (53.3%)     | 18 (60%)         |
| Disease duration, years | NA             | 6.8±2.1*         |
| BASDAI                  | 0.9±0.4        | 4.5±1.5*         |

AS, ankylosing spondylitis; BASDAI, Bath Ankylosing Spondylitis Disease Activity Index. Data are presented as the means ± SD. \*P<0.05, 2-tailed Student's t-test.

**Table S2. Primer pairs used for qRT-PCR, related to STAR methods.**

|              |                                                                      |
|--------------|----------------------------------------------------------------------|
| VEGF         | F: 5'-AGGGCAGAATCATCACGAAGT-3'<br>R: 5'-AGGGTCTCGATTGGATGGCA-3'      |
| FGF2         | F: 5'-AGAAGAGCGACCCTCACATCA-3'<br>R: 5'-CGGTTAGCACACACTCCTTTG-3'     |
| IGF-1        | F: 5'-GCTCTTCAGTTCGTGTGTGGA-3'<br>R: 5'-GCCTCCTTAGATCACAGCTCC-3'     |
| EGF          | F: 5'-TGGATGTGCTTGATAAGCGG-3'<br>R: 5'-ACCATGTCCTTCCAGTGTGT-3'       |
| TGF- $\beta$ | F: 5'-GGCCAGATCCTGTCCAAGC-3'<br>R: 5'-GTGGGTTTCCACCATTAGCAC-3'       |
| IL-6         | F: 5'-ACTCACCTCTTCAGAACGAATTG-3'<br>R: 5'-CCATCTTTGGAAGGTTCAAGTTG-3' |
| GAPDH        | F: 5'-CTGGGCTACACTGAGCACC-3'<br>R: 5'-AAGTGGTCGTTGAGGGCAATG-3'       |
| GRP78        | F: 5'-CATCACGCCGTCCTATGTCG-3'<br>R: 5'-CGTCAAAGACCGTGTTCTCG-3'       |
| GRP94        | F: 5'-CCAGTTTGGTGTCGGTTTCTAT-3'<br>R: 5'-CTGGGTATCGTTGTTGTGTTTTG-3'  |
| IRE1         | F: 5'-AGAGAAGCAGCAGACTTTGTC-3'<br>R: 5'-GTTTTGGTGTCGTACATGGTGA-3'    |
| PERK         | F: 5'-GGAAACGAGAGCCGGATTTATT-3'<br>R: 5'-ACTATGTCCATTATGGCAGCTTC-3'  |
| ATF6         | F: 5'-TCCTCGGTCAGTGGACTCTTA-3'<br>R: 5'-CTTGGGCTGAATTGAAGGTTTTG-3'   |
